# Supplementary material for: Doping-dependent negative dielectric permittivity realized in mono-phase antimony tin oxide ceramics
Source: Royal Society of Chemistry journal article supplement (doi:10.1039/d0tc02266g), 2020-01-01
Supplement: d0tc02266g1.pdf [file d0tc02266g1.pdf]

Supplementary Information for

**Doping-dependent negative dielectric permittivity realized in mono-  
phase antimony tin oxide ceramics**

Guohua Fan <sup>a</sup>, Zhongyang Wang <sup>a</sup>, Kai Sun <sup>b</sup>, Yao Liu <sup>\*a</sup>, Runhua Fan <sup>b</sup>

<sup>a</sup> Key Laboratory for Liquid-Solid Structural Evolution and Processing of Materials

(Ministry of Education), Shandong University, Jinan 250061, China

<sup>b</sup> College of Ocean Science and Engineering, Shanghai Maritime University,

Shanghai 201306, China

\*Corresponding author.

E-mail: liuyao@sdu.edu.cn (Y. Liu)

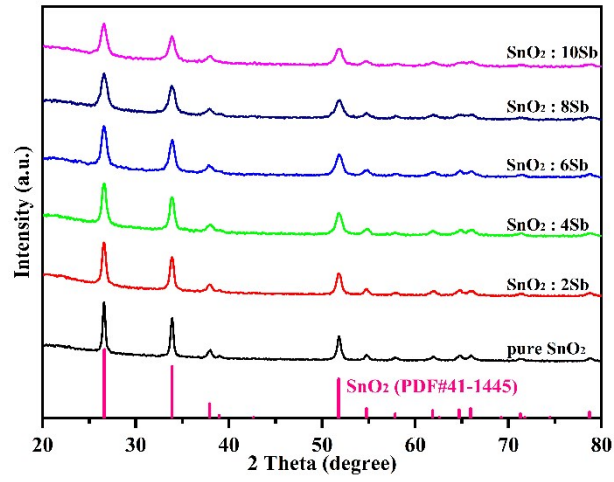

Fig. S1 XRD patterns of the calcined ATO powders

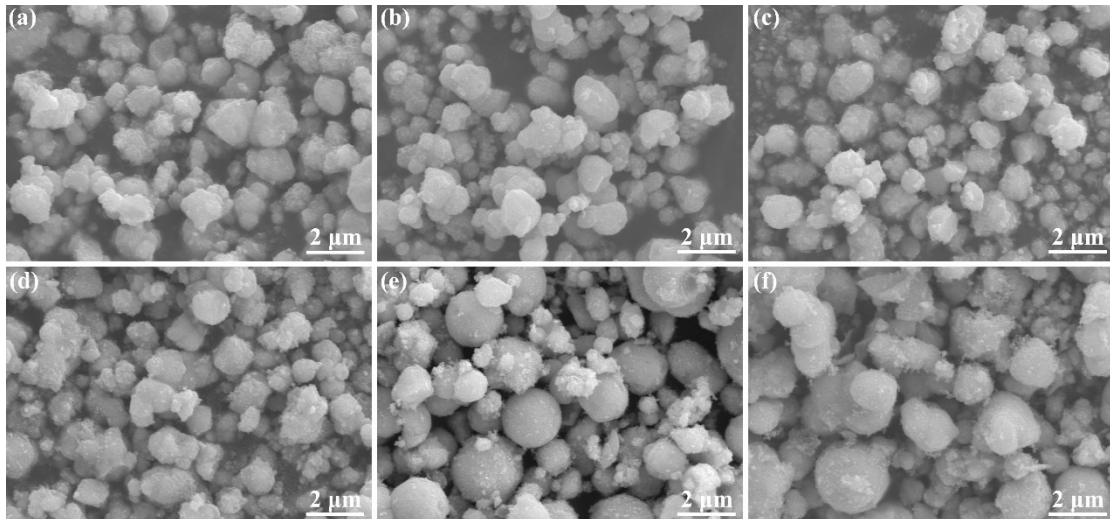

Fig. S2 SEM images of the calcined ATO powders. Sb-doping amount for (a-f) is 0, 2, 4, 6, 8, 10 mol%, respectively.

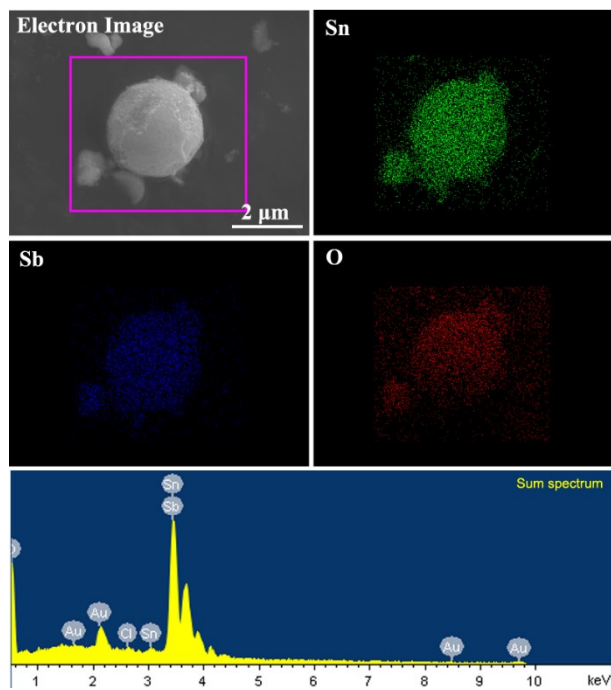

Fig. S3 EDS analysis for the powders of  $\text{SnO}_2 : 8 \text{ Sb}$
